# Supplementary material
Source: Springer Nature journal article supplement (https://www.springermedizin.de/resource/supplementary/12891_2007_367_MOESM10_ESM.pdf/9511164)

| Test | Inter 1 | 2 | Ø | Intra 1 | 2 | Ø | Test | Inter 1 | 2 | Ø | Intra 1 | 2 | Ø |
|------|---------|---|---|---------|---|---|------|---------|---|---|---------|---|---|
|------|---------|---|---|---------|---|---|------|---------|---|---|---------|---|---|

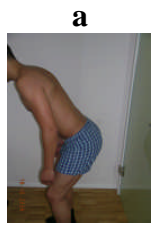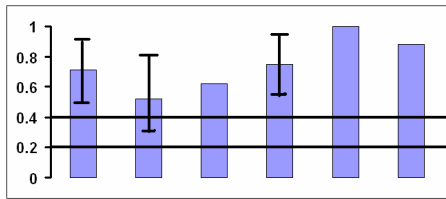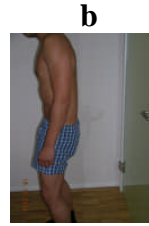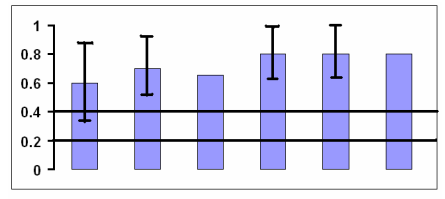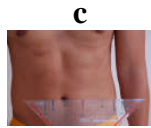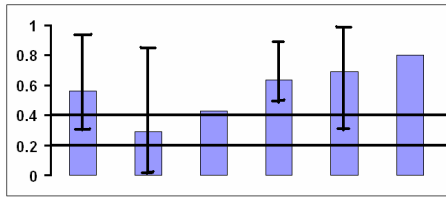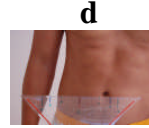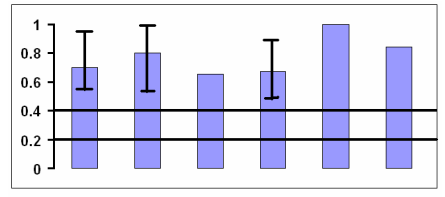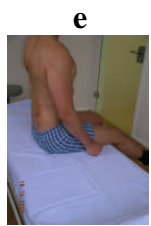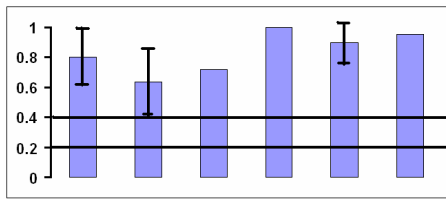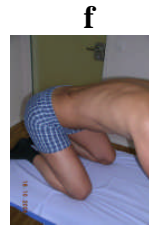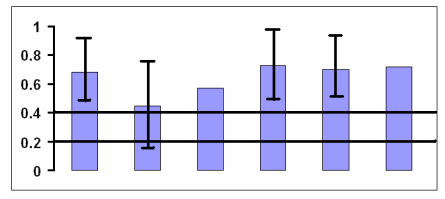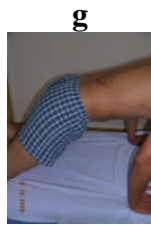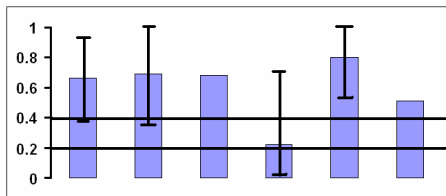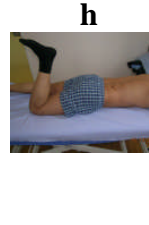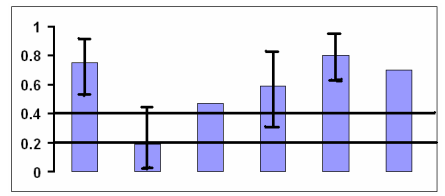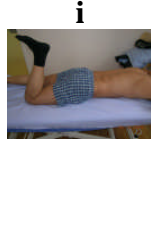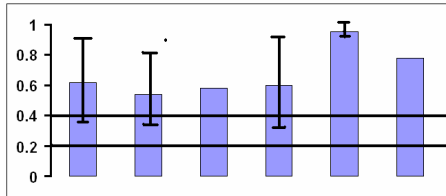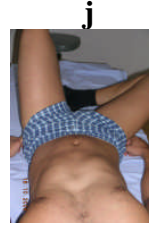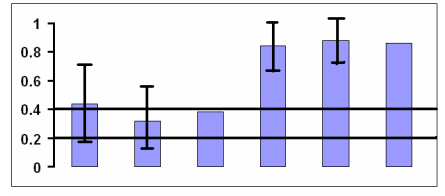

Supplement: MOESM10 [file 9511164]
